# Supplementary material for: Differential Expression of microRNAs in the Non-Permissive Schistosome Host Microtus fortis under Schistosome Infection
Source: PLoS One. 2013 Dec 31;8(12):e85080. doi: 10.1371/journal.pone.0085080 (PMC3877346; doi:10.1371/journal.pone.0085080)
Supplement: Table S1 — Sequences of the primers used for stem-loop RT-PCR. (XLS) [file pone.0085080.s001.xls]

## Sheet: Table S1
Table S1. Sequences of the primers used for stem-loop RT-PCR
miRNA	Name	Sequence(5'-3')*
mmu-miR-494	RNA	UGAAACAUACACGGGAAACCUC
	RT stem-loop primer	GTCGTATCCAGTGCAGGGTCCGAGGTATTCGCACTGGATACGACGAGGTT
	Forward primer	GGCGCAGTGAAACATACACG
	Reversed primer	CAGTGCAGGGTCCGAGGTA
mmu-miR-691	RNA	AUUCCUGAAGAGAGGCAGAAAA
	RT stem-loop primer	GTCGTATCCAGTGCAGGGTCCGAGGTATTCGCACTGGATACGACTTTTCT
	Forward primer	GCGCTGATTCCTGAAGAGAG
	Reversed primer	CAGTGCAGGGTCCGAGGT
mmu-miR-143	RNA	UGAGAUGAAGCACUGUAGCUC
	RT stem-loop primer	GTCGTATCCAGTGCAGGGTCCGAGGTATTCGCACTGGATACGACGAGCTA
	Forward primer	AGGCGCGTGAGATGAAGC
mmu-miR-223	RNA	UGUCAGUUUGUCAAAUACCCCA
	RT stem-loop primer	GTCGTATCCAGTGCAGGGTCCGAGGTATTCGCACTGGATACGACTGGGGT
	Forward primer	TGGCGTGTCAGTTTGTCAAAT
mmu-miR-200a	RNA	UAACACUGUCUGGUAACGAUGU
	RT stem-loop primer	GTCGTATCCAGTGCAGGGTCCGAGGTATTCGCACTGGATACGACACATCG
	Forward primer	TGGCCGTAACACTGTCTGGTA
mmu-miR-322	RNA	CAGCAGCAAUUCAUGUUUUGGA
	RT stem-loop primer	GTCGTATCCAGTGCAGGGTCCGAGGTATTCGCACTGGATACGACTCCAAA
	Forward primer	GGTGCAGCAGCAATTCATGT
mmu-miR-122	RNA	UGGAGUGUGACAAUGGUGUUUG
	RT stem-loop primer	GTCGTATCCAGTGCAGGGTCCGAGGTATTCGCACTGGATACGACCAAACA
	Forward primer	AGGAGTGGAGTGTGACAATGG
mmu-miR-451	RNA	AAACCGUUACCAUUACUGAGUU
	RT stem-loop primer	GTCGTATCCAGTGCAGGGTCCGAGGTATTCGCACTGGATACGACAACTCA
	Forward primer	GCGCGTGGAGTGTGACAAT
	Common reverse primer	CAGTGCAGGGTCCGAGGTAT
mmu-U6-2	RT primer	GGGCCATGCTAAATCTTCTC
	Forward primer	TCGCTTCGGCAGCACATA
	Reversed primer	GGGCCATGCTAATCTTCTCTG
