# Supplementary material for: Differential Expression of microRNAs in the Non-Permissive Schistosome Host Microtus fortis under Schistosome Infection
Source: PLoS One. 2013 Dec 31;8(12):e85080. doi: 10.1371/journal.pone.0085080 (PMC3877346; doi:10.1371/journal.pone.0085080)
Supplement: Table S4 — GO analysis for predicted target genes of differentially expressed miRNAs in M.fortis compared with Mice following S.japonicum infection. (XLS) [file pone.0085080.s004.xls]

## Sheet: Table S4
Table S4 GO analysis of the targets of the differentially expressed miRNAs in different tissues of M. fortis compared with those from BALB/c mice infected with S. japonicum.
down-regulated miRNAs
Category	Term	Count	PValue	Genes
GOTERM_MF_FAT	GO:0030528~transcription regulator activity	35	0.00351737	E2F3, SBNO2, THRB, TBX21, CNOT3, HOXD12, HOXB13, LASS5, CALCOCO1, AHRR, HOXA2, LHX1, BHLHA15, JUND, TEF, NFAT5, RBPJL, ETV4, TLX1, DMBX1, PHOX2B, NACC1, ESRRA, EPAS1, TBX2, SMAD7, SIX6, PROX1, ASCL1, HNF4A, ZMIZ2, NAB2, PHB2, USP49, RFX2
GOTERM_CC_FAT	GO:0005886~plasma membrane	27	0.00108179	SLC5A5, SLC13A5, JPH2, MTDH, SYT4, LITAF, GM2A, CACNB1, SYNGR1, VIPR2, IL17RB, HTR1A, PRRT1, GRID2IP, SLC4A1, GJE1, BRAF, FLT4, G3BP1, HOMER2, ACCN2, OTOG, RGS6, RAB15, VAMP2, FAIM2, PIP4K2B
GOTERM_MF_FAT	GO:0003700~transcription factor activity	24	0.00910174	DMBX1, PHOX2B, E2F3, ESRRA, THRB, EPAS1, SMAD7, TBX2, TBX21, HOXD12, HOXB13, LASS5, SIX6, PROX1, ASCL1, HOXA2, HNF4A, LHX1, JUND, TEF, NFAT5, RBPJL, TLX1, ETV4
GOTERM_MF_FAT	GO:0017076~purine nucleotide binding	22	0.0220199	ARL2, GNAT1, CHDH, PGS1, DNM1L, PFKL, G3BP1, PIP5K1B, PKDCC, SLFN4, GUCY2E, ACTR2, PDGFRA, ERN1, RHOBTB2, PDGFRB, MAPK8, PRKACB, STK38L, NKIRAS1, EHD3, MAP2K6
GOTERM_MF_FAT	GO:0032555~purine ribonucleotide binding	21	0.0274697	ARL2, GNAT1, PGS1, DNM1L, PFKL, G3BP1, PIP5K1B, PKDCC, SLFN4, GUCY2E, ACTR2, PDGFRA, ERN1, RHOBTB2, PDGFRB, MAPK8, PRKACB, STK38L, NKIRAS1, EHD3, MAP2K6
GOTERM_MF_FAT	GO:0032553~ribonucleotide binding	21	0.0274697	ARL2, GNAT1, PGS1, DNM1L, PFKL, G3BP1, PIP5K1B, PKDCC, SLFN4, GUCY2E, ACTR2, PDGFRA, ERN1, RHOBTB2, PDGFRB, MAPK8, PRKACB, STK38L, NKIRAS1, EHD3, MAP2K6
GOTERM_CC_FAT	GO:0044459~plasma membrane part	19	0.000858345	MTDH, GM2A, LITAF, SYT4, FLT4, CACNB1, SYNGR1, HOMER2, IL17RB, ACCN2, OTOG, PRRT1, RGS6, RAB15, GRID2IP, VAMP2, SLC4A1, GJE1, FAIM2
GOTERM_MF_FAT	GO:0000166~nucleotide binding	19	0.0272534	KIFC2, CHDH, BRAF, PFKL, TAOK1, FLT4, G3BP1, PIP5K1B, PKDCC, PSMB8, ACTR2, PLK2, RAB34, ERN1, RAB15, RBM28, CHD5, NKIRAS2, PIP4K2B
GOTERM_MF_FAT	GO:0017076~purine nucleotide binding	18	0.0134015	KIFC2, CHDH, BRAF, PFKL, TAOK1, FLT4, G3BP1, PIP5K1B, PKDCC, PSMB8, ACTR2, PLK2, RAB34, ERN1, RAB15, CHD5, NKIRAS2, PIP4K2B
GOTERM_MF_FAT	GO:0004672~protein kinase activity	18	0.0268644	EGFR, IRAK1, LY6G6E, FASTKD2, PRPF4B, BRAF, NLK, FLT4, MKNK2, ADRBK1, MAPKAPK2, CCND1, BAZ1B, RPS6KA2, MAPK9, EIF2AK2, MERTK, CAMK2A
GOTERM_MF_FAT	GO:0032555~purine ribonucleotide binding	17	0.0197341	KIFC2, BRAF, PFKL, TAOK1, FLT4, G3BP1, PIP5K1B, PKDCC, PSMB8, ACTR2, PLK2, RAB34, ERN1, RAB15, CHD5, NKIRAS2, PIP4K2B
GOTERM_MF_FAT	GO:0032553~ribonucleotide binding	17	0.0197341	KIFC2, BRAF, PFKL, TAOK1, FLT4, G3BP1, PIP5K1B, PKDCC, PSMB8, ACTR2, PLK2, RAB34, ERN1, RAB15, CHD5, NKIRAS2, PIP4K2B
GOTERM_MF_FAT	GO:0043565~sequence-specific DNA binding	17	0.0347209	DMBX1, PHOX2B, ESRRA, THRB, HOXD12, HOXB13, LASS5, PROX1, SIX6, ASCL1, HOXA2, HNF4A, LHX1, JUND, TEF, TLX1, ETV4
GOTERM_MF_FAT	GO:0030528~transcription regulator activity	16	0.0237256	E2F1, TBX3, GLIS2, STAT5B, PAX5, SFPI1, ZKSCAN1, MAFK, MSC, CIAO1, MEIS2, LBH, ZFP287, MZF1, IRF1, RFX2
GOTERM_MF_FAT	GO:0030554~adenyl nucleotide binding	15	0.0245386	KIFC2, CHDH, BRAF, PFKL, TAOK1, FLT4, G3BP1, PIP5K1B, PKDCC, PSMB8, ACTR2, PLK2, ERN1, CHD5, PIP4K2B
GOTERM_MF_FAT	GO:0001883~purine nucleoside binding	15	0.026182	KIFC2, CHDH, BRAF, PFKL, TAOK1, FLT4, G3BP1, PIP5K1B, PKDCC, PSMB8, ACTR2, PLK2, ERN1, CHD5, PIP4K2B
GOTERM_MF_FAT	GO:0001882~nucleoside binding	15	0.0275018	KIFC2, CHDH, BRAF, PFKL, TAOK1, FLT4, G3BP1, PIP5K1B, PKDCC, PSMB8, ACTR2, PLK2, ERN1, CHD5, PIP4K2B
GOTERM_MF_FAT	GO:0032555~purine ribonucleotide binding	15	0.00282129	GTPBP2, PGS1, BRAF, STK11, RTCD1, PDE10A, AFG3L1, PLK2, BAZ1B, ATP2A3, RHOBTB2, GRK4, ARL5B, HSPA8, MAP2K6
GOTERM_MF_FAT	GO:0032553~ribonucleotide binding	15	0.00282129	GTPBP2, PGS1, BRAF, STK11, RTCD1, PDE10A, AFG3L1, PLK2, BAZ1B, ATP2A3, RHOBTB2, GRK4, ARL5B, HSPA8, MAP2K6
GOTERM_MF_FAT	GO:0017076~purine nucleotide binding	15	0.00413067	GTPBP2, PGS1, BRAF, STK11, RTCD1, PDE10A, AFG3L1, PLK2, BAZ1B, ATP2A3, RHOBTB2, GRK4, ARL5B, HSPA8, MAP2K6
GOTERM_MF_FAT	GO:0000166~nucleotide binding	15	0.0159821	GTPBP2, PGS1, BRAF, STK11, RTCD1, PDE10A, AFG3L1, PLK2, BAZ1B, ATP2A3, RHOBTB2, GRK4, ARL5B, HSPA8, MAP2K6
GOTERM_MF_FAT	GO:0008092~cytoskeletal protein binding	15	0.0140455	PARVG, ARC, WASF3, MYO1C, ACTN1, HOMER2, ESPN, TNS4, CORO1C, DNASE1, SDC1, NDEL1, SPNB1, PAFAH1B1, WIPF1
GOTERM_MF_FAT	GO:0005524~ATP binding	14	0.0329742	KIFC2, BRAF, PFKL, TAOK1, FLT4, G3BP1, PIP5K1B, PKDCC, PSMB8, ACTR2, PLK2, ERN1, CHD5, PIP4K2B
GOTERM_MF_FAT	GO:0032559~adenyl ribonucleotide binding	14	0.0358106	KIFC2, BRAF, PFKL, TAOK1, FLT4, G3BP1, PIP5K1B, PKDCC, PSMB8, ACTR2, PLK2, ERN1, CHD5, PIP4K2B
GOTERM_MF_FAT	GO:0042802~identical protein binding	13	0.00503644	DMBX1, THRB, MASP1, ACTN1, L1CAM, PRRC1, AMOTL1, STUB1, TRIM55, HNF4A, BHLHA15, PVRL3, PAFAH1B1
GOTERM_MF_FAT	GO:0046983~protein dimerization activity	13	0.0164332	DMBX1, THRB, EPAS1, MASP1, ACTN1, STUB1, HNF4A, BHLHA15, PVRL3, JUND, TEF, PAFAH1B1, TLX1
GOTERM_MF_FAT	GO:0015267~channel activity	13	0.0267396	KCNC1, KCNC3, CACNG2, AQP6, ACCN2, ACCN1, CLIC5, CACNA1E, KCNQ1, GJE1, TNFAIP1, CHRNA2, CLCN5
GOTERM_MF_FAT	GO:0022803~passive transmembrane transporter activity	13	0.0267396	KCNC1, KCNC3, CACNG2, AQP6, ACCN2, ACCN1, CLIC5, CACNA1E, KCNQ1, GJE1, TNFAIP1, CHRNA2, CLCN5
GOTERM_MF_FAT	GO:0003700~transcription factor activity	13	0.00912728	E2F1, TBX3, GLIS2, STAT5B, PAX5, SFPI1, ZKSCAN1, MAFK, CIAO1, MEIS2, ZFP287, MZF1, IRF1
GOTERM_MF_FAT	GO:0032559~adenyl ribonucleotide binding	12	0.0113316	PGS1, BAZ1B, PLK2, BRAF, STK11, ATP2A3, RTCD1, PDE10A, GRK4, AFG3L1, MAP2K6, HSPA8
GOTERM_MF_FAT	GO:0030554~adenyl nucleotide binding	12	0.0161341	PGS1, BAZ1B, PLK2, BRAF, STK11, ATP2A3, RTCD1, PDE10A, GRK4, AFG3L1, MAP2K6, HSPA8
GOTERM_MF_FAT	GO:0001883~purine nucleoside binding	12	0.0171049	PGS1, BAZ1B, PLK2, BRAF, STK11, ATP2A3, RTCD1, PDE10A, GRK4, AFG3L1, MAP2K6, HSPA8
GOTERM_MF_FAT	GO:0001882~nucleoside binding	12	0.0178816	PGS1, BAZ1B, PLK2, BRAF, STK11, ATP2A3, RTCD1, PDE10A, GRK4, AFG3L1, MAP2K6, HSPA8
GOTERM_MF_FAT	GO:0003779~actin binding	12	0.0124555	CORO1C, TNS4, PARVG, DNASE1, ARC, MYO1C, WASF3, SPNB1, ACTN1, WIPF1, HOMER2, ESPN
GOTERM_MF_FAT	GO:0005524~ATP binding	11	0.0271045	PGS1, BAZ1B, PLK2, BRAF, STK11, ATP2A3, RTCD1, GRK4, AFG3L1, MAP2K6, HSPA8
GOTERM_MF_FAT	GO:0022836~gated channel activity	11	0.0259375	ACCN2, KCNC1, ACCN1, KCNC3, CLIC5, CACNA1E, CACNG2, KCNQ1, TNFAIP1, CLCN5, CHRNA2
GOTERM_MF_FAT	GO:0031420~alkali metal ion binding	10	0.0102676	ACCN2, KCNC1, ACCN1, SLC17A8, SLC38A3, KCNC3, SLC5A1, SLC12A5, KCNQ1, SLC9A1
GOTERM_BP_FAT	GO:0042981~regulation of apoptosis	10	0.0161238	TBX3, GSDMA, STAT5B, SHISA5, ERN1, MAPK8, NGFR, BCL2L13, PTEN, RASA1
GOTERM_BP_FAT	GO:0043067~regulation of programmed cell death	10	0.0173599	TBX3, GSDMA, STAT5B, SHISA5, ERN1, MAPK8, NGFR, BCL2L13, PTEN, RASA1
GOTERM_BP_FAT	GO:0010941~regulation of cell death	10	0.0179104	TBX3, GSDMA, STAT5B, SHISA5, ERN1, MAPK8, NGFR, BCL2L13, PTEN, RASA1
GOTERM_BP_FAT	GO:0006357~regulation of transcription from RNA polymerase II promoter	10	0.0298743	CIAO1, E2F1, IFNAR2, DNMT3A, LBH, MEIS2, GLIS2, STAT5B, IRF1, PAX5
GOTERM_MF_FAT	GO:0042803~protein homodimerization activity	9	0.0201116	DMBX1, MASP1, HNF4A, THRB, BHLHA15, PVRL3, ACTN1, PAFAH1B1, STUB1
GOTERM_MF_FAT	GO:0005083~small GTPase regulator activity	9	0.0421391	TBC1D24, ACAP3, CYTH1, MADD, D10BWG1379E, SYNGAP1, VAV1, SPATA13, AGAP3
GOTERM_CC_FAT	GO:0005829~cytosol	9	0.02896	DNM1L, PFKL, INPP5K, OTOG, G3BP1, MAPK8, KLC2, PRKACB, PSTPIP2
GOTERM_BP_FAT	GO:0006915~apoptosis	8	0.0105939	MEF2D, TNFRSF10B, XIAP, LITAF, ERN1, PIGT, BCL2L13, FAIM2
GOTERM_BP_FAT	GO:0012501~programmed cell death	8	0.0115613	MEF2D, TNFRSF10B, XIAP, LITAF, ERN1, PIGT, BCL2L13, FAIM2
GOTERM_BP_FAT	GO:0008219~cell death	8	0.0164006	MEF2D, TNFRSF10B, XIAP, LITAF, ERN1, PIGT, BCL2L13, FAIM2
GOTERM_BP_FAT	GO:0016265~death	8	0.0184107	MEF2D, TNFRSF10B, XIAP, LITAF, ERN1, PIGT, BCL2L13, FAIM2
GOTERM_CC_FAT	GO:0045202~synapse	8	0.00107042	ACCN2, CPLX2, SYT4, GRID2IP, VAMP2, SYNGR1, HOMER2, FAIM2
GOTERM_CC_FAT	GO:0030054~cell junction	8	0.00911549	MTDH, SYT4, GRID2IP, VAMP2, SYNGR1, GJE1, HOMER2, FAIM2
GOTERM_MF_FAT	GO:0005244~voltage-gated ion channel activity	8	0.0376814	KCNC1, KCNC3, CLIC5, CACNA1E, CACNG2, KCNQ1, TNFAIP1, CLCN5
GOTERM_MF_FAT	GO:0022832~voltage-gated channel activity	8	0.0376814	KCNC1, KCNC3, CLIC5, CACNA1E, CACNG2, KCNQ1, TNFAIP1, CLCN5
GOTERM_BP_FAT	GO:0043009~chordate embryonic development	8	0.029415	RDH10, TBX3, INPP5K, NUP50, PDGFRA, PDGFRB, DLL1, ITGB1
GOTERM_BP_FAT	GO:0009792~embryonic development ending in birth or egg hatching	8	0.030744	RDH10, TBX3, INPP5K, NUP50, PDGFRA, PDGFRB, DLL1, ITGB1
GOTERM_BP_FAT	GO:0006915~apoptosis	8	0.0463089	E2F1, GSDMA, SHISA5, ERN1, NGFR, BCL2L13, PTEN, NTN1
GOTERM_BP_FAT	GO:0012501~programmed cell death	8	0.0499368	E2F1, GSDMA, SHISA5, ERN1, NGFR, BCL2L13, PTEN, NTN1
GOTERM_BP_FAT	GO:0045935~positive regulation of nucleobase, nucleoside, nucleotide and nucleic acid metabolic process	7	0.0166021	E2F1, ESRRA, ZFP287, GLIS2, VEGFA, 5430437P03RIK, IHH
GOTERM_BP_FAT	GO:0051173~positive regulation of nitrogen compound metabolic process	7	0.0190414	E2F1, ESRRA, ZFP287, GLIS2, VEGFA, 5430437P03RIK, IHH
GOTERM_BP_FAT	GO:0006357~regulation of transcription from RNA polymerase II promoter	7	0.0374308	E2F1, IFNAR2, ESRRA, GLIS2, VEGFA, BCL6B, IHH
GOTERM_BP_FAT	GO:0010604~positive regulation of macromolecule metabolic process	7	0.041866	E2F1, ESRRA, ZFP287, GLIS2, VEGFA, 5430437P03RIK, IHH
GOTERM_MF_FAT	GO:0004672~protein kinase activity	7	0.0161841	NRP1, BAZ1B, PLK2, BRAF, STK11, GRK4, MAP2K6
GOTERM_MF_FAT	GO:0015293~symporter activity	7	0.0282411	SLC2A9, SLC17A8, SLC38A3, SLC6A20B, SLC5A1, SLC12A5, SLC6A19
GOTERM_MF_FAT	GO:0003774~motor activity	7	0.0340544	KIF13A, DYNLL1, MYO1C, MYL6B, KLC2, KIF3C, DCTN2
GOTERM_BP_FAT	GO:0001701~in utero embryonic development	7	0.0115707	RDH10, TBX3, INPP5K, PDGFRA, PDGFRB, DLL1, ITGB1
GOTERM_BP_FAT	GO:0001501~skeletal system development	7	0.0155361	RDH10, LECT1, TBX3, HEXA, PDGFRA, PDGFRB, MAPK8
GOTERM_MF_FAT	GO:0005525~GTP binding	7	0.0412317	ARL2, GNAT1, DNM1L, RHOBTB2, NKIRAS1, GUCY2E, EHD3
GOTERM_MF_FAT	GO:0032561~guanyl ribonucleotide binding	7	0.0456348	ARL2, GNAT1, DNM1L, RHOBTB2, NKIRAS1, GUCY2E, EHD3
GOTERM_MF_FAT	GO:0019001~guanyl nucleotide binding	7	0.0456348	ARL2, GNAT1, DNM1L, RHOBTB2, NKIRAS1, GUCY2E, EHD3
GOTERM_CC_FAT	GO:0044456~synapse part	6	0.00423202	SYT4, GRID2IP, VAMP2, SYNGR1, HOMER2, FAIM2
GOTERM_BP_FAT	GO:0045941~positive regulation of transcription	6	0.042533	E2F1, ESRRA, ZFP287, GLIS2, VEGFA, IHH
GOTERM_BP_FAT	GO:0010628~positive regulation of gene expression	6	0.0468416	E2F1, ESRRA, ZFP287, GLIS2, VEGFA, IHH
GOTERM_MF_FAT	GO:0031402~sodium ion binding	6	0.0342839	ACCN2, ACCN1, SLC17A8, SLC38A3, SLC5A1, SLC9A1
GOTERM_BP_FAT	GO:0012502~induction of programmed cell death	6	0.00657201	GSDMA, SHISA5, ERN1, MAPK8, NGFR, PTEN
GOTERM_BP_FAT	GO:0006917~induction of apoptosis	6	0.00657201	GSDMA, SHISA5, ERN1, MAPK8, NGFR, PTEN
GOTERM_BP_FAT	GO:0051726~regulation of cell cycle	6	0.0177931	E2F1, TBX3, CCND2, STAT5B, PTEN, ITGB1
GOTERM_BP_FAT	GO:0043065~positive regulation of apoptosis	6	0.0311122	GSDMA, SHISA5, ERN1, MAPK8, NGFR, PTEN
GOTERM_BP_FAT	GO:0043068~positive regulation of programmed cell death	6	0.0320481	GSDMA, SHISA5, ERN1, MAPK8, NGFR, PTEN
GOTERM_BP_FAT	GO:0010942~positive regulation of cell death	6	0.0330016	GSDMA, SHISA5, ERN1, MAPK8, NGFR, PTEN
GOTERM_BP_FAT	GO:0003006~reproductive developmental process	6	0.0390947	RDH10, TBX3, STAT5B, PDGFRA, PTEN, PCSK4
GOTERM_MF_FAT	GO:0016563~transcription activator activity	6	0.0380573	E2F1, ZFP287, LBH, GLIS2, PAX5, SFPI1
GOTERM_MF_FAT	GO:0015294~solute:cation symporter activity	5	0.0386786	SLC2A9, SLC6A20B, SLC5A1, SLC12A5, SLC6A19
GOTERM_BP_FAT	GO:0045596~negative regulation of cell differentiation	5	0.0399743	TBX3, STAT5B, DLL1, ITGB1, NTN1
GOTERM_BP_FAT	GO:0051046~regulation of secretion	4	0.0276119	PPARD, PFKL, SYT4, VAMP2
GOTERM_BP_FAT	GO:0048514~blood vessel morphogenesis	4	0.0460088	NRP1, VEGFA, RASA1, IHH
GOTERM_MF_FAT	GO:0001727~lipid kinase activity	4	0.0112811	PIK3CD, PIP4K2A, PIP4K2C, PIP4K2B
GOTERM_MF_FAT	GO:0004428~inositol or phosphatidylinositol kinase activity	4	0.0228029	PIK3CD, PIP4K2A, PIP4K2C, PIP4K2B
GOTERM_BP_FAT	GO:0045137~development of primary sexual characteristics	4	0.0372986	RDH10, TBX3, STAT5B, PDGFRA
GOTERM_BP_FAT	GO:0030098~lymphocyte differentiation	4	0.0468601	STAT5B, IRF1, PPP3CB, SFPI1
GOTERM_BP_FAT	GO:0030384~phosphoinositide metabolic process	3	0.0428498	PIP5K1B, PIGT, PIP4K2B
GOTERM_CC_FAT	GO:0019717~synaptosome	3	0.0436068	ACCN2, GRID2IP, VAMP2
GOTERM_CC_FAT	GO:0008021~synaptic vesicle	3	0.0460168	SYT4, VAMP2, SYNGR1
GOTERM_BP_FAT	GO:0001569~patterning of blood vessels	3	0.0041935	NRP1, VEGFA, IHH
GOTERM_BP_FAT	GO:0050678~regulation of epithelial cell proliferation	3	0.0268388	STK11, VEGFA, IHH
GOTERM_CC_FAT	GO:0042470~melanosome	3	0.0329868	ANXA11, CANX, HSPA8
GOTERM_CC_FAT	GO:0048770~pigment granule	3	0.0329868	ANXA11, CANX, HSPA8
GOTERM_MF_FAT	GO:0016309~1-phosphatidylinositol-5-phosphate 4-kinase activity	3	0.000900105	PIP4K2A, PIP4K2C, PIP4K2B
GOTERM_MF_FAT	GO:0016307~phosphatidylinositol phosphate kinase activity	3	0.0124536	PIP4K2A, PIP4K2C, PIP4K2B
GOTERM_BP_FAT	GO:0048008~platelet-derived growth factor receptor signaling pathway	3	0.0113474	PDGFRA, PDGFRB, PTEN
GOTERM_BP_FAT	GO:0007216~metabotropic glutamate receptor signaling pathway	2	0.0258582	GRID2IP, HOMER2
GOTERM_MF_FAT	GO:0016308~1-phosphatidylinositol-4-phosphate 5-kinase activity	2	0.03076	PIP5K1B, PIP4K2B
GOTERM_MF_FAT	GO:0017075~syntaxin-1 binding	2	0.0408046	CPLX2, VAMP2
GOTERM_BP_FAT	GO:0008038~neuron recognition	2	0.0475242	NRP1, EFNB3
GOTERM_MF_FAT	GO:0047555~3',5'-cyclic-GMP phosphodiesterase activity	2	0.0382406	PDE1B, PDE10A
GOTERM_BP_FAT	GO:0001953~negative regulation of cell-matrix adhesion	2	0.0416562	PTEN, RASA1
GOTERM_BP_FAT	GO:0040023~establishment of nucleus localization	2	0.0484299	SLIT1, NTN1
GOTERM_BP_FAT	GO:0010812~negative regulation of cell-substrate adhesion	2	0.0484299	PTEN, RASA1
GOTERM_MF_FAT	GO:0005021~vascular endothelial growth factor receptor activity	2	0.0489953	PDGFRA, PDGFRB
up-regulated miRNAs
Category	Term	Count	PValue	Genes
GOTERM_CC_FAT	GO:0005886~plasma membrane	69	0.00125365	KCNC1, ADCY1, KCNC3, SLC6A20B, TACR2, SLC5A1, EFNA2, NCS1, L1CAM, AQP6, SYNGR1, AMOTL1, TRAK2, RALB, DLG4, GNG4, KCNQ1, GJE1, COX16, CHRNA2, EGFR, PARVG, PTGER1, ARC, BRAF, G3BP1, MFI2, ACTN1, TNS4, CRHR2, RAB15, CTSB, TNFAIP1, GRASP, H2-T3, CPLX3, SLC38A3, LITAF, CD247, CDH2, ESPN, IGSF11, ACE, LY6E, PLIN4, RASGRP1, PVRL3, SPNB1, TECTB, CAMK2A, LPL, SLC2A9, MYO1C, FLT4, SLC12A5, CELSR2, HOMER2, …
GOTERM_BP_FAT	GO:0045449~regulation of transcription	53	0.00905936	E2F3, THRB, TBX21, HOXD12, CNOT3, LASS5, MCM7, BHLHA15, RBPJL, MLL1, PHOX2B, IRAK1, SIX6, PROX1, ZFP592, ASCL1, IFNAR2, CHMP1A, BAZ1B, BTG2, HNF4A, ZMIZ2, NAB2, MCTS1, SUV420H1, CRTC2, SBNO2, LITAF, HOXB13, CALCOCO1, HOXA2, AHRR, LHX1, BCL11B, JUND, TEF, NFAT5, ZFP523, TLX1, ETV4, DMBX1, YEATS4, ESRRA, NACC1, EPAS1, TBX2, SMAD7, NLK, CELSR2, PHB2, USP49, RFX2, BMP7
GOTERM_BP_FAT	GO:0006350~transcription	44	0.00959879	CRTC2, E2F3, SBNO2, LITAF, THRB, TBX21, CNOT3, HOXD12, HOXB13, CALCOCO1, AHRR, HOXA2, MCM7, LHX1, BHLHA15, BCL11B, JUND, TEF, NFAT5, ZFP523, RBPJL, ETV4, MLL1, DMBX1, YEATS4, NACC1, ESRRA, EPAS1, TBX2, SMAD7, NLK, PROX1, ZFP592, ASCL1, CHMP1A, BAZ1B, HNF4A, BTG2, PHB2, NAB2, USP49, RFX2, MCTS1, SUV420H1
GOTERM_CC_FAT	GO:0044459~plasma membrane part	44	0.00147839	KCNC1, CPLX3, SLC38A3, KCNC3, SLC6A20B, LITAF, SLC5A1, CD247, NCS1, L1CAM, CDH2, AQP6, SYNGR1, AMOTL1, ESPN, PVRL3, DLG4, RALB, GNG4, TECTB, KCNQ1, GJE1, CAMK2A, COX16, CHRNA2, PARVG, EGFR, SLC2A9, ARC, MYO1C, FLT4, ACTN1, HOMER2, SLC6A19, ACCN2, TNS4, ACCN1, SLC17A8, RAB15, CACNA1E, CTSB, TNFAIP1, H2-T3, SLC9A1
GOTERM_BP_FAT	GO:0051252~regulation of RNA metabolic process	38	0.0113736	E2F3, SBNO2, THRB, TBX21, HOXD12, HOXB13, MAPKAPK2, LASS5, CALCOCO1, AHRR, HOXA2, LHX1, BHLHA15, BCL11B, JUND, TEF, NFAT5, RBPJL, ETV4, TLX1, MLL1, DMBX1, YEATS4, PHOX2B, ESRRA, EPAS1, TBX2, SMAD7, CELSR2, SIX6, ASCL1, IFNAR2, CHMP1A, HNF4A, ZMIZ2, USP49, RFX2, BMP7
GOTERM_BP_FAT	GO:0006355~regulation of transcription, DNA-dependent	37	0.0148539	E2F3, SBNO2, THRB, TBX21, HOXD12, HOXB13, LASS5, CALCOCO1, AHRR, HOXA2, LHX1, BHLHA15, BCL11B, JUND, TEF, NFAT5, RBPJL, ETV4, TLX1, MLL1, DMBX1, YEATS4, PHOX2B, ESRRA, EPAS1, TBX2, SMAD7, CELSR2, SIX6, ASCL1, IFNAR2, CHMP1A, HNF4A, ZMIZ2, USP49, RFX2, BMP7
GOTERM_BP_FAT	GO:0045449~regulation of transcription	36	0.00114245	E2F1, PPARD, LCORL, CNOT8, THRB, SFPI1, SEC14L2, ATF1, RCBTB1, VDR, MEIS2, ELOF1, ZKSCAN17, CHD5, AA987161, PLAG1, YEATS4, DNMT3A, ESRRA, IKZF2, FOXJ2, SMAD7, KLF11, ARID3A, MXD1, HLTF, FOXP4, ABCG1, MEF2D, HOXD8, VEGFA, SMARCC2, EDF1, CAND1, SCMH1, ZFP202
GOTERM_MF_FAT	GO:0030528~transcription regulator activity	35	0.00351737	E2F3, SBNO2, THRB, TBX21, CNOT3, HOXD12, HOXB13, LASS5, CALCOCO1, AHRR, HOXA2, LHX1, BHLHA15, JUND, TEF, NFAT5, RBPJL, ETV4, TLX1, DMBX1, PHOX2B, NACC1, ESRRA, EPAS1, TBX2, SMAD7, SIX6, PROX1, ASCL1, HNF4A, ZMIZ2, NAB2, PHB2, USP49, RFX2
GOTERM_BP_FAT	GO:0006350~transcription	33	0.000174066	E2F1, PPARD, LCORL, CNOT8, THRB, SFPI1, CDC73, SEC14L2, ATF1, RCBTB1, VDR, ELOF1, ZKSCAN17, AA987161, PLAG1, YEATS4, DNMT3A, ESRRA, IKZF2, FOXJ2, SMAD7, KLF11, ARID3A, HLTF, MXD1, FOXP4, MEF2D, HOXD8, SMARCC2, EDF1, CAND1, SCMH1, ZFP202
GOTERM_MF_FAT	GO:0000166~nucleotide binding	32	0.0145871	KIFC2, RAD51C, SLFN4, ARL5B, STK38L, RBM28, CHD5, RABL3, CLCN4-2, TAOK1, FLT4, G3BP1, HLTF, KIF3C, AFG3L1, RAD50, ABCG1, PSMB8, RND3, CDC42BPG, RND1, GNAQ, RPS6KA2, GSK3B, RAB34, DYRK1A, TUBAL3, RAB15, DHX40, ABCC2, EIF2AK2, PIP4K2B
GOTERM_MF_FAT	GO:0032555~purine ribonucleotide binding	31	0.00155714	KIFC2, RAD51C, SLFN4, STK38L, CHD5, ARL5B, RABL3, CLCN4-2, TAOK1, FLT4, G3BP1, HLTF, KIF3C, AFG3L1, RAD50, ABCG1, PSMB8, RND3, CDC42BPG, RND1, GNAQ, RPS6KA2, GSK3B, RAB34, DYRK1A, TUBAL3, RAB15, DHX40, ABCC2, EIF2AK2, PIP4K2B
GOTERM_MF_FAT	GO:0032553~ribonucleotide binding	31	0.00155714	KIFC2, RAD51C, SLFN4, STK38L, CHD5, ARL5B, RABL3, CLCN4-2, TAOK1, FLT4, G3BP1, HLTF, KIF3C, AFG3L1, RAD50, ABCG1, PSMB8, RND3, CDC42BPG, RND1, GNAQ, RPS6KA2, GSK3B, RAB34, DYRK1A, TUBAL3, RAB15, DHX40, ABCC2, EIF2AK2, PIP4K2B
GOTERM_MF_FAT	GO:0017076~purine nucleotide binding	31	0.00293938	KIFC2, RAD51C, SLFN4, STK38L, CHD5, ARL5B, RABL3, CLCN4-2, TAOK1, FLT4, G3BP1, HLTF, KIF3C, AFG3L1, RAD50, ABCG1, PSMB8, RND3, CDC42BPG, RND1, GNAQ, RPS6KA2, GSK3B, RAB34, DYRK1A, TUBAL3, RAB15, DHX40, ABCC2, EIF2AK2, PIP4K2B
GOTERM_MF_FAT	GO:0003677~DNA binding	30	0.00279016	E2F1, RAD51C, PPARD, LCORL, THRB, SFPI1, ATF1, VDR, MEIS2, ZKSCAN17, CHD5, PLAG1, ESCO1, DNMT3A, ESRRA, IKZF2, FOXJ2, SMAD7, G3BP1, KLF11, ARID3A, ARID1A, HLTF, MXD1, FOXP4, MEF2D, HOXD8, SMARCC2, EDF1, ZFP202
GOTERM_CC_FAT	GO:0005856~cytoskeleton	30	0.01198	WASF3, NCS1, KLC2, TTLL1, KRT33A, ESPN, KIF13A, DYNLL1, FRMD8, MYL6B, 1700011A15RIK, SPNB1, DLG4, PAFAH1B1, WIPF1, PARVG, ARC, MYO1C, LDB3, ACTN1, HOMER2, KIF3C, DCTN2, CORO1C, TNS4, CHMP1A, NDEL1, RPS6KA2, CLIC5, CALM3
GOTERM_CC_FAT	GO:0044459~plasma membrane part	25	0.00646302	KCNC1, GM2A, CAPZA2, CACNB1, ITGB3, AMOTL1, CXADR, SYNGR1, SLC11A2, PVRL4, PRRT1, SLC4A1, PLD2, KCND1, FLT4, CD40, HOMER2, ABCG1, ACCN2, RND1, GNAQ, RAB15, ABCC2, VAMP2, FAIM2
GOTERM_BP_FAT	GO:0007242~intracellular signaling cascade	25	0.0226201	ADCY1, MKNK2, CALCOCO1, EIF4EBP2, BHLHA15, RASGRP1, RALB, AGAP3, COX16, BRAF, SOCS2, MADD, NLK, PIK3CD, VAV1, DNAJC27, CCND1, RPS6KA2, RAB34, MAPK9, RAB15, SYNGAP1, SPATA13, ASB7, SLC9A1
GOTERM_BP_FAT	GO:0006355~regulation of transcription, DNA-dependent	24	0.00956773	E2F1, YEATS4, DNMT3A, PPARD, ESRRA, IKZF2, FOXJ2, THRB, SMAD7, KLF11, ARID3A, SFPI1, HLTF, FOXP4, ATF1, VDR, MEF2D, HOXD8, MEIS2, ZKSCAN17, VEGFA, CAND1, ZFP202, AA987161
GOTERM_BP_FAT	GO:0051252~regulation of RNA metabolic process	24	0.0114266	E2F1, YEATS4, DNMT3A, PPARD, ESRRA, IKZF2, FOXJ2, THRB, SMAD7, KLF11, ARID3A, SFPI1, HLTF, FOXP4, ATF1, VDR, MEF2D, HOXD8, MEIS2, ZKSCAN17, VEGFA, CAND1, ZFP202, AA987161
GOTERM_MF_FAT	GO:0003700~transcription factor activity	24	0.00910174	DMBX1, PHOX2B, E2F3, ESRRA, THRB, EPAS1, SMAD7, TBX2, TBX21, HOXD12, HOXB13, LASS5, SIX6, PROX1, ASCL1, HOXA2, HNF4A, LHX1, JUND, TEF, NFAT5, RBPJL, TLX1, ETV4
GOTERM_MF_FAT	GO:0030528~transcription regulator activity	23	0.00252888	E2F1, PPARD, ESRRA, IKZF2, LCORL, THRB, FOXJ2, SMAD7, KLF11, ARID3A, SFPI1, HLTF, MXD1, FOXP4, ATF1, VDR, MEF2D, HOXD8, MEIS2, ZKSCAN17, CAND1, SCMH1, ZFP202
GOTERM_MF_FAT	GO:0005524~ATP binding	23	0.0195826	KIFC2, RAD51C, CLCN4-2, TAOK1, FLT4, G3BP1, HLTF, AFG3L1, KIF3C, SLFN4, ABCG1, PSMB8, RAD50, CDC42BPG, RPS6KA2, GSK3B, DYRK1A, ABCC2, DHX40, EIF2AK2, STK38L, CHD5, PIP4K2B
GOTERM_MF_FAT	GO:0032559~adenyl ribonucleotide binding	23	0.0220918	KIFC2, RAD51C, CLCN4-2, TAOK1, FLT4, G3BP1, HLTF, AFG3L1, KIF3C, SLFN4, ABCG1, PSMB8, RAD50, CDC42BPG, RPS6KA2, GSK3B, DYRK1A, ABCC2, DHX40, EIF2AK2, STK38L, CHD5, PIP4K2B
GOTERM_MF_FAT	GO:0030554~adenyl nucleotide binding	23	0.0362876	KIFC2, RAD51C, CLCN4-2, TAOK1, FLT4, G3BP1, HLTF, AFG3L1, KIF3C, SLFN4, ABCG1, PSMB8, RAD50, CDC42BPG, RPS6KA2, GSK3B, DYRK1A, ABCC2, DHX40, EIF2AK2, STK38L, CHD5, PIP4K2B
GOTERM_MF_FAT	GO:0001883~purine nucleoside binding	23	0.0393253	KIFC2, RAD51C, CLCN4-2, TAOK1, FLT4, G3BP1, HLTF, AFG3L1, KIF3C, SLFN4, ABCG1, PSMB8, RAD50, CDC42BPG, RPS6KA2, GSK3B, DYRK1A, ABCC2, DHX40, EIF2AK2, STK38L, CHD5, PIP4K2B
GOTERM_MF_FAT	GO:0001882~nucleoside binding	23	0.0417887	KIFC2, RAD51C, CLCN4-2, TAOK1, FLT4, G3BP1, HLTF, AFG3L1, KIF3C, SLFN4, ABCG1, PSMB8, RAD50, CDC42BPG, RPS6KA2, GSK3B, DYRK1A, ABCC2, DHX40, EIF2AK2, STK38L, CHD5, PIP4K2B
GOTERM_CC_FAT	GO:0042995~cell projection	23	0.000250041	ARC, CPLX2, MYO1C, SLC5A1, SLC12A5, LDB3, NCS1, L1CAM, CDH2, KLC2, DCTN2, ESPN, ACCN2, SEMA6A, ACCN1, NDEL1, TULP3, CLIC5, RAB34, PAFAH1B1, CYGB, MERTK, SYNGAP1
GOTERM_CC_FAT	GO:0044430~cytoskeletal part	23	0.010254	ARC, MYO1C, NCS1, ACTN1, KLC2, TTLL1, KIF3C, HOMER2, KRT33A, DCTN2, ESPN, KIF13A, CHMP1A, NDEL1, DYNLL1, RPS6KA2, MYL6B, CLIC5, 1700011A15RIK, SPNB1, DLG4, CALM3, PAFAH1B1
GOTERM_BP_FAT	GO:0010604~positive regulation of macromolecule metabolic process	22	0.00266239	E2F3, ESRRA, THRB, EPAS1, TBX21, STUB1, CALCOCO1, ASCL1, AHRR, HOXA2, HNF4A, BHLHA15, ZMIZ2, BCL11B, TEF, NFAT5, FTSJD2, BMP7, RBPJL, TLX1, MLL1, ETV4
GOTERM_BP_FAT	GO:0045935~positive regulation of nucleobase, nucleoside, nucleotide and nucleic acid metabolic process	20	0.00114967	E2F3, ESRRA, THRB, EPAS1, TBX21, CALCOCO1, ASCL1, HOXA2, HNF4A, BHLHA15, ZMIZ2, BCL11B, TEF, NFAT5, FTSJD2, BMP7, RBPJL, TLX1, MLL1, ETV4
GOTERM_BP_FAT	GO:0051173~positive regulation of nitrogen compound metabolic process	20	0.00164807	E2F3, ESRRA, THRB, EPAS1, TBX21, CALCOCO1, ASCL1, HOXA2, HNF4A, BHLHA15, ZMIZ2, BCL11B, TEF, NFAT5, FTSJD2, BMP7, RBPJL, TLX1, MLL1, ETV4
GOTERM_BP_FAT	GO:0006357~regulation of transcription from RNA polymerase II promoter	20	0.00897746	DMBX1, ESRRA, THRB, EPAS1, TBX2, CALCOCO1, IFNAR2, ASCL1, AHRR, HOXA2, HNF4A, BHLHA15, ZMIZ2, BCL11B, TEF, NFAT5, USP49, BMP7, TLX1, MLL1
GOTERM_BP_FAT	GO:0006811~ion transport	20	0.0346993	KCNC1, SLC38A3, KCNC3, SLC5A1, SLC12A5, MFI2, CACNG2, ACCN2, SLC17A8, ACCN1, BHLHA15, CLIC5, CACNA1E, KCNQ1, CAMK2A, TNFAIP1, NIPAL4, CLCN5, SLC9A1, CHRNA2
GOTERM_CC_FAT	GO:0005654~nucleoplasm	19	0.0116516	DMBX1, YEATS4, E2F3, NACC1, EPAS1, MYO1C, SMAD7, TBX2, HOXD12, HOXB13, PAXIP1, CCND1, HNF4A, WDR12, MDM2, USP49, RBPJL, MLL1, MLL2
GOTERM_MF_FAT	GO:0003677~DNA binding	18	0.0469334	ZFP36, DNMT3A, RAD23B, PRRXL1, ESRRA, G3BP1, MBD6, HES7, CBX2, GRHL2, WT1, FOS, ASCL1, HIF1A, ZBED3, HIVEP2, TCFEB, PITX1
GOTERM_BP_FAT	GO:0045941~positive regulation of transcription	18	0.00317114	E2F3, ESRRA, THRB, EPAS1, CALCOCO1, ASCL1, HOXA2, HNF4A, BHLHA15, ZMIZ2, BCL11B, TEF, NFAT5, BMP7, RBPJL, TLX1, MLL1, ETV4
GOTERM_BP_FAT	GO:0010628~positive regulation of gene expression	18	0.00411349	E2F3, ESRRA, THRB, EPAS1, CALCOCO1, ASCL1, HOXA2, HNF4A, BHLHA15, ZMIZ2, BCL11B, TEF, NFAT5, BMP7, RBPJL, TLX1, MLL1, ETV4
GOTERM_BP_FAT	GO:0010557~positive regulation of macromolecule biosynthetic process	18	0.00916923	E2F3, ESRRA, THRB, EPAS1, CALCOCO1, ASCL1, HOXA2, HNF4A, BHLHA15, ZMIZ2, BCL11B, TEF, NFAT5, BMP7, RBPJL, TLX1, MLL1, ETV4
GOTERM_BP_FAT	GO:0031328~positive regulation of cellular biosynthetic process	18	0.0133121	E2F3, ESRRA, THRB, EPAS1, CALCOCO1, ASCL1, HOXA2, HNF4A, BHLHA15, ZMIZ2, BCL11B, TEF, NFAT5, BMP7, RBPJL, TLX1, MLL1, ETV4
GOTERM_BP_FAT	GO:0009891~positive regulation of biosynthetic process	18	0.014467	E2F3, ESRRA, THRB, EPAS1, CALCOCO1, ASCL1, HOXA2, HNF4A, BHLHA15, ZMIZ2, BCL11B, TEF, NFAT5, BMP7, RBPJL, TLX1, MLL1, ETV4
GOTERM_BP_FAT	GO:0006468~protein amino acid phosphorylation	18	0.0462312	EGFR, IRAK1, PRPF4B, BRAF, SMAD7, MADD, NLK, FLT4, MKNK2, ADRBK1, MAPKAPK2, CCND1, BAZ1B, RPS6KA2, MAPK9, EIF2AK2, MERTK, CAMK2A
GOTERM_MF_FAT	GO:0004672~protein kinase activity	18	0.0268644	EGFR, IRAK1, LY6G6E, FASTKD2, PRPF4B, BRAF, NLK, FLT4, MKNK2, ADRBK1, MAPKAPK2, CCND1, BAZ1B, RPS6KA2, MAPK9, EIF2AK2, MERTK, CAMK2A
GOTERM_MF_FAT	GO:0003700~transcription factor activity	17	0.003176	E2F1, ESRRA, PPARD, THRB, FOXJ2, SMAD7, KLF11, ARID3A, SFPI1, FOXP4, ATF1, VDR, MEF2D, MEIS2, HOXD8, ZKSCAN17, ZFP202
GOTERM_BP_FAT	GO:0045893~positive regulation of transcription, DNA-dependent	17	0.00201186	E2F3, ESRRA, THRB, EPAS1, CALCOCO1, ASCL1, HOXA2, HNF4A, BHLHA15, ZMIZ2, BCL11B, TEF, NFAT5, BMP7, RBPJL, TLX1, MLL1
GOTERM_BP_FAT	GO:0051254~positive regulation of RNA metabolic process	17	0.00218345	E2F3, ESRRA, THRB, EPAS1, CALCOCO1, ASCL1, HOXA2, HNF4A, BHLHA15, ZMIZ2, BCL11B, TEF, NFAT5, BMP7, RBPJL, TLX1, MLL1
GOTERM_BP_FAT	GO:0046907~intracellular transport	17	0.00289706	PACS1, STON2, YWHAZ, STX8, YWHAB, KLC2, SYNGR1, NDEL1, BHLHA15, MYL6B, PAFAH1B1, GOSR2, GOSR1, WIPF1, COX16, APBA1, GRASP
GOTERM_BP_FAT	GO:0030001~metal ion transport	17	0.00367655	KCNC1, SLC38A3, KCNC3, SLC5A1, SLC12A5, MFI2, CACNG2, ACCN2, SLC17A8, ACCN1, BHLHA15, CACNA1E, KCNQ1, CAMK2A, TNFAIP1, NIPAL4, SLC9A1
GOTERM_BP_FAT	GO:0006812~cation transport	17	0.0149305	KCNC1, SLC38A3, KCNC3, SLC5A1, SLC12A5, MFI2, CACNG2, ACCN2, SLC17A8, ACCN1, BHLHA15, CACNA1E, KCNQ1, CAMK2A, TNFAIP1, NIPAL4, SLC9A1
GOTERM_BP_FAT	GO:0042127~regulation of cell proliferation	17	0.0215687	EGFR, E2F3, NACC1, PDGFB, FLT4, NTN1, PROX1, TRIM35, HNF4A, LHX1, BCL11B, PHB2, BMP7, EIF2AK2, TLX1, MLL1, ETV4
GOTERM_CC_FAT	GO:0030054~cell junction	17	0.0055645	PARVG, CPLX3, ARC, NCS1, ACTN1, CDH2, AMOTL1, SYNGR1, HOMER2, ESPN, TNS4, SLC17A8, PVRL3, DLG4, CAMK2A, GJE1, CHRNA2
GOTERM_MF_FAT	GO:0043565~sequence-specific DNA binding	17	0.0347209	DMBX1, PHOX2B, ESRRA, THRB, HOXD12, HOXB13, LASS5, PROX1, SIX6, ASCL1, HOXA2, HNF4A, LHX1, JUND, TEF, TLX1, ETV4
GOTERM_BP_FAT	GO:0030182~neuron differentiation	16	0.00344449	L1CAM, NTN1, WNT1, ASCL1, SEMA6A, HOXA2, NDEL1, TULP3, BTG2, LHX1, BCL11B, CLIC5, SYNGAP1, BMP7, TLX1, ETV4
GOTERM_CC_FAT	GO:0012505~endomembrane system	16	0.0349525	SLC2A9, EXTL3, MYO1C, ACTN1, ST8SIA3, ST8SIA2, RFNG, SLC17A8, DNASE1, CHMP1A, NDEL1, GOSR2, PAFAH1B1, GOSR1, GRASP, PHLDA1
GOTERM_BP_FAT	GO:0007242~intracellular signaling cascade	15	0.049132	GDI1, RABL3, ARHGEF18, RND3, CDC42BPG, RND1, GNAQ, RPS6KA2, GSK3B, RAB34, PRRT1, RAB15, STK38L, SPATA13, ARL5B
GOTERM_BP_FAT	GO:0045944~positive regulation of transcription from RNA polymerase II promoter	15	0.00328938	ESRRA, THRB, EPAS1, CALCOCO1, ASCL1, HOXA2, HNF4A, BHLHA15, ZMIZ2, BCL11B, TEF, NFAT5, BMP7, TLX1, MLL1
GOTERM_CC_FAT	GO:0044451~nucleoplasm part	15	0.0491667	DMBX1, YEATS4, NACC1, E2F3, EPAS1, SMAD7, TBX2, HOXD12, HOXB13, PAXIP1, HNF4A, USP49, RBPJL, MLL1, MLL2
GOTERM_MF_FAT	GO:0008092~cytoskeletal protein binding	15	0.0140455	PARVG, ARC, WASF3, MYO1C, ACTN1, HOMER2, ESPN, TNS4, CORO1C, DNASE1, SDC1, NDEL1, SPNB1, PAFAH1B1, WIPF1
GOTERM_BP_FAT	GO:0006811~ion transport	14	0.0166835	KCNC1, SLC5A5, SLC13A5, SLC8A2, KCND1, CLCN4-2, CAPZA2, CACNB1, CACNG2, TRPM2, ACCN2, SLC11A2, VDR, SLC4A1
GOTERM_BP_FAT	GO:0007389~pattern specification process	14	0.00115958	ARC, HOXD12, CELSR2, RFNG, ASCL1, WNT1, HOXA2, WNT3, TULP3, BTG2, LHX1, SYNGAP1, BMP7, MLL1
GOTERM_CC_FAT	GO:0043005~neuron projection	14	0.000242945	CPLX2, ARC, SLC12A5, NCS1, L1CAM, KLC2, ESPN, DCTN2, ACCN2, ACCN1, SEMA6A, NDEL1, CYGB, SYNGAP1
GOTERM_BP_FAT	GO:0006357~regulation of transcription from RNA polymerase II promoter	13	0.013377	E2F1, DNMT3A, ESRRA, PPARD, IKZF2, THRB, HLTF, FOXP4, MEIS2, HOXD8, ZKSCAN17, VEGFA, CAND1
GOTERM_BP_FAT	GO:0032989~cellular component morphogenesis	13	0.0170785	EGFR, L1CAM, NTN1, PROX1, SEMA6A, HOXA2, NDEL1, BCL11B, CLIC5, PAFAH1B1, BMP7, GJE1, ETV4
GOTERM_BP_FAT	GO:0006928~cell motion	13	0.0233232	EGFR, PHOX2B, PDGFB, L1CAM, CDH2, NTN1, ASCL1, SEMA6A, HOXA2, NDEL1, PAFAH1B1, BMP7, ETV4
GOTERM_CC_FAT	GO:0045202~synapse	13	0.00743736	CPLX3, CPLX2, ARC, NCS1, L1CAM, CDH2, SYNGR1, HOMER2, ACCN2, SLC17A8, DLG4, CAMK2A, CHRNA2
GOTERM_MF_FAT	GO:0042802~identical protein binding	13	0.00503644	DMBX1, THRB, MASP1, ACTN1, L1CAM, PRRC1, AMOTL1, STUB1, TRIM55, HNF4A, BHLHA15, PVRL3, PAFAH1B1
GOTERM_MF_FAT	GO:0046983~protein dimerization activity	13	0.0164332	DMBX1, THRB, EPAS1, MASP1, ACTN1, STUB1, HNF4A, BHLHA15, PVRL3, JUND, TEF, PAFAH1B1, TLX1
GOTERM_MF_FAT	GO:0015267~channel activity	13	0.0267396	KCNC1, KCNC3, CACNG2, AQP6, ACCN2, ACCN1, CLIC5, CACNA1E, KCNQ1, GJE1, TNFAIP1, CHRNA2, CLCN5
GOTERM_MF_FAT	GO:0022803~passive transmembrane transporter activity	13	0.0267396	KCNC1, KCNC3, CACNG2, AQP6, ACCN2, ACCN1, CLIC5, CACNA1E, KCNQ1, GJE1, TNFAIP1, CHRNA2, CLCN5
GOTERM_BP_FAT	GO:0042127~regulation of cell proliferation	12	0.0126931	PPARD, PDGFB, CCND2, D17WSU104E, FLT4, CAPZA2, PRRT1, VEGFA, CD40, CXADR, EIF2AK2, PTEN
GOTERM_MF_FAT	GO:0043565~sequence-specific DNA binding	12	0.018414	MEF2D, VDR, PPARD, ESRRA, MEIS2, HOXD8, FOXJ2, THRB, EDF1, SFPI1, FOXP4, ATF1
GOTERM_BP_FAT	GO:0000902~cell morphogenesis	12	0.0165421	EGFR, SEMA6A, HOXA2, NDEL1, CLIC5, BCL11B, L1CAM, BMP7, PROX1, GJE1, NTN1, ETV4
GOTERM_MF_FAT	GO:0003779~actin binding	12	0.0124555	CORO1C, TNS4, PARVG, DNASE1, ARC, MYO1C, WASF3, SPNB1, ACTN1, WIPF1, HOMER2, ESPN
GOTERM_BP_FAT	GO:0030001~metal ion transport	11	0.00894946	ACCN2, SLC11A2, KCNC1, VDR, SLC5A5, SLC8A2, SLC13A5, KCND1, CACNB1, CACNG2, TRPM2
GOTERM_BP_FAT	GO:0006915~apoptosis	11	0.0124726	E2F1, MEF2D, SEMA6A, TNFRSF10B, CASP7, KLF11, PIGT, EIF2AK2, PTEN, BCL2L11, FAIM2
GOTERM_BP_FAT	GO:0012501~programmed cell death	11	0.0139165	E2F1, MEF2D, SEMA6A, TNFRSF10B, CASP7, KLF11, PIGT, EIF2AK2, PTEN, BCL2L11, FAIM2
GOTERM_BP_FAT	GO:0008219~cell death	11	0.0214895	E2F1, MEF2D, SEMA6A, TNFRSF10B, CASP7, KLF11, PIGT, EIF2AK2, PTEN, BCL2L11, FAIM2
GOTERM_BP_FAT	GO:0006812~cation transport	11	0.0236411	ACCN2, SLC11A2, KCNC1, VDR, SLC5A5, SLC8A2, SLC13A5, KCND1, CACNB1, CACNG2, TRPM2
GOTERM_BP_FAT	GO:0016265~death	11	0.0247738	E2F1, MEF2D, SEMA6A, TNFRSF10B, CASP7, KLF11, PIGT, EIF2AK2, PTEN, BCL2L11, FAIM2
GOTERM_BP_FAT	GO:0048732~gland development	11	0.00201086	EGFR, CCND1, PDGFB, SOCS2, LY6E, TBX2, PHB2, HOXB13, BMP7, NTN1, ETV4
GOTERM_BP_FAT	GO:0016044~membrane organization	11	0.0181516	CORO1C, STON2, ARC, NDEL1, RAB34, DLG4, PAFAH1B1, MERTK, VAV1, COX16, CLCN5
GOTERM_BP_FAT	GO:0007167~enzyme linked receptor protein signaling pathway	11	0.0186849	EGFR, EIF4EBP2, PDGFB, SMAD7, FLT4, NLK, FRS3, BMP7, SYNGAP1, STUB1, GFRA2
GOTERM_BP_FAT	GO:0006886~intracellular protein transport	11	0.0197778	PACS1, STON2, YWHAZ, STX8, YWHAB, GOSR2, GOSR1, SYNGR1, COX16, APBA1, GRASP
GOTERM_BP_FAT	GO:0007267~cell-cell signaling	11	0.0266418	CPLX3, WNT1, WNT3, BHLHA15, LHX1, SLC12A5, WNT9B, PAFAH1B1, SYNGAP1, GJE1, APBA1
GOTERM_BP_FAT	GO:0048666~neuron development	11	0.027829	SEMA6A, ASCL1, HOXA2, NDEL1, CLIC5, BCL11B, L1CAM, BMP7, SYNGAP1, NTN1, ETV4
GOTERM_BP_FAT	GO:0034613~cellular protein localization	11	0.0321179	PACS1, STON2, YWHAZ, STX8, YWHAB, GOSR2, GOSR1, SYNGR1, COX16, APBA1, GRASP
GOTERM_BP_FAT	GO:0070727~cellular macromolecule localization	11	0.0335552	PACS1, STON2, YWHAZ, STX8, YWHAB, GOSR2, GOSR1, SYNGR1, COX16, APBA1, GRASP
GOTERM_BP_FAT	GO:0015672~monovalent inorganic cation transport	11	0.0345428	ACCN2, KCNC1, ACCN1, SLC17A8, SLC38A3, KCNC3, SLC5A1, SLC12A5, KCNQ1, TNFAIP1, SLC9A1
GOTERM_BP_FAT	GO:0030030~cell projection organization	11	0.0463211	SEMA6A, HOXA2, NDEL1, PDGFB, CLIC5, BCL11B, L1CAM, BMP7, SYNGAP1, NTN1, ETV4
GOTERM_MF_FAT	GO:0022836~gated channel activity	11	0.0259375	ACCN2, KCNC1, ACCN1, KCNC3, CLIC5, CACNA1E, CACNG2, KCNQ1, TNFAIP1, CLCN5, CHRNA2
GOTERM_BP_FAT	GO:0006811~ion transport	10	0.0405667	ATP6V0C, KCNC1, CACNA2D1, KCNAB3, SLC13A5, MFI2, CLCNKB, KCNH7, KCNK3, SCN4A
GOTERM_BP_FAT	GO:0031327~negative regulation of cellular biosynthetic process	10	0.0204076	DNMT3A, VDR, PPARD, HOXD8, INSIG2, THRB, ZKSCAN17, KLF11, SCMH1, FOXP4
GOTERM_BP_FAT	GO:0009890~negative regulation of biosynthetic process	10	0.0215193	DNMT3A, VDR, PPARD, HOXD8, INSIG2, THRB, ZKSCAN17, KLF11, SCMH1, FOXP4
GOTERM_BP_FAT	GO:0055085~transmembrane transport	10	0.0298334	SLC11A2, KCNC1, SLC5A5, SLC35B1, SLC13A5, KCND1, CLCN4-2, XPO7, DNAJC19, TRPM2
GOTERM_BP_FAT	GO:0016055~Wnt receptor signaling pathway	10	0.00037606	WNT1, DKK3, CCND1, SDC1, WNT3, NLK, KREMEN1, WNT9B, CELSR2, CALCOCO1
GOTERM_BP_FAT	GO:0044057~regulation of system process	10	0.00747575	CPLX3, EPAS1, THRB, SMAD7, DLG4, NCS1, ADRBK1, SYNGAP1, SYNGR1, CAMK2A
GOTERM_BP_FAT	GO:0000904~cell morphogenesis involved in differentiation	10	0.0104203	SEMA6A, HOXA2, NDEL1, CLIC5, BCL11B, L1CAM, BMP7, PROX1, NTN1, ETV4
GOTERM_BP_FAT	GO:0051056~regulation of small GTPase mediated signal transduction	10	0.0160879	TBC1D24, NDEL1, ACAP3, CYTH1, RASGRP1, PAFAH1B1, D10BWG1379E, VAV1, SPATA13, AGAP3
GOTERM_BP_FAT	GO:0048729~tissue morphogenesis	10	0.0206424	EGFR, WNT3, LY6E, SMAD7, PHB2, CASP8, HOXB13, BMP7, PROX1, ETV4
GOTERM_BP_FAT	GO:0007423~sensory organ development	10	0.0317712	WNT1, ASCL1, HOXA2, TULP3, PVRL3, CLIC5, BCL11B, BMP7, PROX1, GJE1
GOTERM_MF_FAT	GO:0031420~alkali metal ion binding	10	0.0102676	ACCN2, KCNC1, ACCN1, SLC17A8, SLC38A3, KCNC3, SLC5A1, SLC12A5, KCNQ1, SLC9A1
GOTERM_BP_FAT	GO:0055085~transmembrane transport	10	0.0028903	ATP6V0C, SLC45A3, KCNC1, KCNAB3, SLC13A5, CLCNKB, KCNH7, XPO7, SLC7A11, SCN4A
GOTERM_BP_FAT	GO:0006812~cation transport	9	0.0182977	ATP6V0C, KCNC1, CACNA2D1, KCNAB3, SLC13A5, MFI2, KCNH7, KCNK3, SCN4A
GOTERM_BP_FAT	GO:0006357~regulation of transcription from RNA polymerase II promoter	9	0.0458554	FOS, DNMT3A, ASCL1, ESRRA, HIF1A, HES7, CBX2, TCFEB, WT1
GOTERM_BP_FAT	GO:0016481~negative regulation of transcription	9	0.0244379	DNMT3A, VDR, PPARD, HOXD8, THRB, ZKSCAN17, KLF11, SCMH1, FOXP4
GOTERM_BP_FAT	GO:0045934~negative regulation of nucleobase, nucleoside, nucleotide and nucleic acid metabolic process	9	0.0340974	DNMT3A, VDR, PPARD, HOXD8, THRB, ZKSCAN17, KLF11, SCMH1, FOXP4
GOTERM_BP_FAT	GO:0051172~negative regulation of nitrogen compound metabolic process	9	0.0358541	DNMT3A, VDR, PPARD, HOXD8, THRB, ZKSCAN17, KLF11, SCMH1, FOXP4
GOTERM_BP_FAT	GO:0010629~negative regulation of gene expression	9	0.0400291	DNMT3A, VDR, PPARD, HOXD8, THRB, ZKSCAN17, KLF11, SCMH1, FOXP4
GOTERM_BP_FAT	GO:0010558~negative regulation of macromolecule biosynthetic process	9	0.0440041	DNMT3A, VDR, PPARD, HOXD8, THRB, ZKSCAN17, KLF11, SCMH1, FOXP4
GOTERM_BP_FAT	GO:0051960~regulation of nervous system development	9	0.00379578	PHOX2B, ASCL1, HOXA2, TULP3, SOCS2, LHX1, BMP7, SYNGAP1, NTN1
GOTERM_BP_FAT	GO:0009968~negative regulation of signal transduction	9	0.00889866	DKK3, CCND1, TULP3, SOCS2, HNF4A, NLK, PHB2, ADRBK1, BMP7
GOTERM_BP_FAT	GO:0046578~regulation of Ras protein signal transduction	9	0.0122702	TBC1D24, NDEL1, ACAP3, CYTH1, PAFAH1B1, D10BWG1379E, VAV1, SPATA13, AGAP3
GOTERM_BP_FAT	GO:0048667~cell morphogenesis involved in neuron differentiation	9	0.0126499	SEMA6A, HOXA2, NDEL1, CLIC5, BCL11B, L1CAM, BMP7, NTN1, ETV4
GOTERM_BP_FAT	GO:0010648~negative regulation of cell communication	9	0.0142664	DKK3, CCND1, TULP3, SOCS2, HNF4A, NLK, PHB2, ADRBK1, BMP7
GOTERM_BP_FAT	GO:0010324~membrane invagination	9	0.0151325	CORO1C, STON2, ARC, RAB34, DLG4, MERTK, VAV1, COX16, CLCN5
GOTERM_BP_FAT	GO:0006897~endocytosis	9	0.0151325	CORO1C, STON2, ARC, RAB34, DLG4, MERTK, VAV1, COX16, CLCN5
GOTERM_BP_FAT	GO:0040007~growth	9	0.0174856	DMBX1, NDEL1, PDGFB, LY6E, BMP7, GJE1, APBA1, TNKS2, SLC9A1
GOTERM_BP_FAT	GO:0051094~positive regulation of developmental process	9	0.0300282	PHOX2B, LPL, ASCL1, SOCS2, THRB, JUND, BMP7, PROX1, NTN1
GOTERM_BP_FAT	GO:0003002~regionalization	9	0.0300282	WNT1, ARC, HOXA2, TULP3, WNT3, BTG2, LHX1, CELSR2, MLL1
GOTERM_BP_FAT	GO:0031175~neuron projection development	9	0.0329884	SEMA6A, HOXA2, NDEL1, BCL11B, L1CAM, BMP7, SYNGAP1, NTN1, ETV4
GOTERM_BP_FAT	GO:0008285~negative regulation of cell proliferation	9	0.0378868	TRIM35, HNF4A, PHB2, BCL11B, BMP7, EIF2AK2, PROX1, MLL1, ETV4
GOTERM_CC_FAT	GO:0044456~synapse part	9	0.0261223	SLC17A8, ARC, DLG4, NCS1, L1CAM, SYNGR1, CAMK2A, HOMER2, CHRNA2
GOTERM_CC_FAT	GO:0005667~transcription factor complex	9	0.0427918	DMBX1, E2F3, HNF4A, EPAS1, SMAD7, TBX2, HOXD12, HOXB13, RBPJL
GOTERM_MF_FAT	GO:0042803~protein homodimerization activity	9	0.0201116	DMBX1, MASP1, HNF4A, THRB, BHLHA15, PVRL3, ACTN1, PAFAH1B1, STUB1
GOTERM_MF_FAT	GO:0005083~small GTPase regulator activity	9	0.0421391	TBC1D24, ACAP3, CYTH1, MADD, D10BWG1379E, SYNGAP1, VAV1, SPATA13, AGAP3
GOTERM_BP_FAT	GO:0030001~metal ion transport	8	0.0243924	KCNC1, CACNA2D1, KCNAB3, SLC13A5, MFI2, KCNH7, KCNK3, SCN4A
GOTERM_BP_FAT	GO:0007264~small GTPase mediated signal transduction	8	0.0110932	GDI1, RND3, RABL3, RND1, ARHGEF18, RAB34, RAB15, ARL5B
GOTERM_BP_FAT	GO:0008284~positive regulation of cell proliferation	8	0.0179464	PPARD, PDGFB, CCND2, D17WSU104E, FLT4, PRRT1, VEGFA, CD40
GOTERM_BP_FAT	GO:0007605~sensory perception of sound	8	0.000558919	ACCN1, SLC17A8, THRB, CLIC5, TMC1, TECTB, GJE1, ESPN
GOTERM_BP_FAT	GO:0050954~sensory perception of mechanical stimulus	8	0.000964131	ACCN1, SLC17A8, THRB, CLIC5, TMC1, TECTB, GJE1, ESPN
GOTERM_BP_FAT	GO:0060284~regulation of cell development	8	0.0189861	PHOX2B, ASCL1, HOXA2, SOCS2, BMP7, SYNGAP1, PROX1, NTN1
GOTERM_BP_FAT	GO:0007409~axonogenesis	8	0.0214293	SEMA6A, HOXA2, NDEL1, BCL11B, L1CAM, BMP7, NTN1, ETV4
GOTERM_BP_FAT	GO:0045597~positive regulation of cell differentiation	8	0.0301668	PHOX2B, LPL, ASCL1, SOCS2, THRB, JUND, BMP7, NTN1
GOTERM_BP_FAT	GO:0048812~neuron projection morphogenesis	8	0.0308783	SEMA6A, HOXA2, NDEL1, BCL11B, L1CAM, BMP7, NTN1, ETV4
GOTERM_BP_FAT	GO:0030029~actin filament-based process	8	0.0308783	CORO1C, PDGFB, MYL6B, ACTN1, PAFAH1B1, WIPF1, PROX1, ESPN
GOTERM_CC_FAT	GO:0044463~cell projection part	8	0.0242221	ACCN2, ARC, TULP3, MYO1C, L1CAM, KLC2, SYNGAP1, ESPN
GOTERM_MF_FAT	GO:0005244~voltage-gated ion channel activity	8	0.0376814	KCNC1, KCNC3, CLIC5, CACNA1E, CACNG2, KCNQ1, TNFAIP1, CLCN5
GOTERM_MF_FAT	GO:0022832~voltage-gated channel activity	8	0.0376814	KCNC1, KCNC3, CLIC5, CACNA1E, CACNG2, KCNQ1, TNFAIP1, CLCN5
GOTERM_BP_FAT	GO:0015672~monovalent inorganic cation transport	7	0.013775	ATP6V0C, KCNC1, KCNAB3, SLC13A5, KCNH7, KCNK3, SCN4A
GOTERM_MF_FAT	GO:0005244~voltage-gated ion channel activity	7	0.000879291	KCNC1, CACNA2D1, KCNAB3, CLCNKB, KCNH7, KCNK3, SCN4A
GOTERM_MF_FAT	GO:0022832~voltage-gated channel activity	7	0.000879291	KCNC1, CACNA2D1, KCNAB3, CLCNKB, KCNH7, KCNK3, SCN4A
GOTERM_MF_FAT	GO:0022836~gated channel activity	7	0.00821619	KCNC1, CACNA2D1, KCNAB3, CLCNKB, KCNH7, KCNK3, SCN4A
GOTERM_MF_FAT	GO:0005216~ion channel activity	7	0.021856	KCNC1, CACNA2D1, KCNAB3, CLCNKB, KCNH7, KCNK3, SCN4A
GOTERM_MF_FAT	GO:0022838~substrate specific channel activity	7	0.0249883	KCNC1, CACNA2D1, KCNAB3, CLCNKB, KCNH7, KCNK3, SCN4A
GOTERM_MF_FAT	GO:0015267~channel activity	7	0.0265068	KCNC1, CACNA2D1, KCNAB3, CLCNKB, KCNH7, KCNK3, SCN4A
GOTERM_MF_FAT	GO:0022803~passive transmembrane transporter activity	7	0.0265068	KCNC1, CACNA2D1, KCNAB3, CLCNKB, KCNH7, KCNK3, SCN4A
GOTERM_BP_FAT	GO:0015674~di-, tri-valent inorganic cation transport	7	0.00416963	ACCN2, SLC11A2, VDR, SLC8A2, CACNB1, CACNG2, TRPM2
GOTERM_BP_FAT	GO:0048732~gland development	7	0.0108452	PLAG1, VDR, PDGFB, CAPZA2, VEGFA, PTEN, BCL2L11
GOTERM_BP_FAT	GO:0007507~heart development	7	0.0189331	GNAQ, SMAD7, CASP7, ADAM19, CXADR, FOXP4, PTEN
GOTERM_MF_FAT	GO:0008047~enzyme activator activity	7	0.0333744	GDI1, RGS20, PPARD, TNFRSF10B, GM2A, SEC14L2, RASA1
GOTERM_MF_FAT	GO:0016563~transcription activator activity	7	0.0392568	E2F1, MEF2D, PPARD, IKZF2, CAND1, SFPI1, HLTF
GOTERM_BP_FAT	GO:0022612~gland morphogenesis	7	0.00304969	EGFR, PDGFB, TBX2, PHB2, HOXB13, BMP7, ETV4
GOTERM_BP_FAT	GO:0006814~sodium ion transport	7	0.0199037	ACCN2, ACCN1, SLC17A8, SLC38A3, SLC5A1, SLC12A5, SLC9A1
GOTERM_BP_FAT	GO:0050767~regulation of neurogenesis	7	0.0252272	PHOX2B, ASCL1, HOXA2, SOCS2, BMP7, SYNGAP1, NTN1
GOTERM_BP_FAT	GO:0045165~cell fate commitment	7	0.039638	WNT1, ASCL1, HOXA2, WNT3, TBX2, PROX1, TLX1
GOTERM_BP_FAT	GO:0009952~anterior/posterior pattern formation	7	0.0466158	WNT1, ARC, HOXA2, WNT3, BTG2, LHX1, MLL1
GOTERM_CC_FAT	GO:0030425~dendrite	7	0.0103185	ACCN2, ARC, CPLX2, SLC12A5, NCS1, SYNGAP1, ESPN
GOTERM_MF_FAT	GO:0015293~symporter activity	7	0.0282411	SLC2A9, SLC17A8, SLC38A3, SLC6A20B, SLC5A1, SLC12A5, SLC6A19
GOTERM_MF_FAT	GO:0003774~motor activity	7	0.0340544	KIF13A, DYNLL1, MYO1C, MYL6B, KLC2, KIF3C, DCTN2
GOTERM_MF_FAT	GO:0031420~alkali metal ion binding	6	0.00932445	KCNC1, KCNAB3, SLC13A5, KCNH7, KCNK3, SCN4A
GOTERM_MF_FAT	GO:0005261~cation channel activity	6	0.0194366	KCNC1, CACNA2D1, KCNAB3, KCNH7, KCNK3, SCN4A
GOTERM_MF_FAT	GO:0046873~metal ion transmembrane transporter activity	6	0.034982	KCNC1, CACNA2D1, KCNAB3, KCNH7, KCNK3, SCN4A
GOTERM_BP_FAT	GO:0006816~calcium ion transport	6	0.00571208	ACCN2, VDR, SLC8A2, CACNB1, CACNG2, TRPM2
GOTERM_MF_FAT	GO:0031420~alkali metal ion binding	6	0.0489952	ACCN2, KCNC1, SLC5A5, SLC13A5, KCND1, TRPM2
GOTERM_BP_FAT	GO:0030879~mammary gland development	6	0.0155527	CCND1, SOCS2, TBX2, PHB2, NTN1, ETV4
GOTERM_BP_FAT	GO:0015837~amine transport	6	0.0202527	SLC17A8, SLC38A3, LY6E, CTNS, SLC6A19, APBA1
GOTERM_BP_FAT	GO:0043087~regulation of GTPase activity	6	0.0211169	TBC1D24, NDEL1, ACAP3, PAFAH1B1, VAV1, AGAP3
GOTERM_BP_FAT	GO:0007411~axon guidance	6	0.0257978	SEMA6A, HOXA2, L1CAM, BMP7, NTN1, ETV4
GOTERM_BP_FAT	GO:0050804~regulation of synaptic transmission	6	0.0278418	CPLX3, DLG4, NCS1, SYNGAP1, SYNGR1, CAMK2A
GOTERM_BP_FAT	GO:0007018~microtubule-based movement	6	0.0289013	KIF13A, NDEL1, DYNLL1, PAFAH1B1, KLC2, KIF3C
GOTERM_BP_FAT	GO:0021700~developmental maturation	6	0.0289013	WNT1, EPAS1, BHLHA15, RPS6KA2, DLG4, HOXB13
GOTERM_BP_FAT	GO:0045664~regulation of neuron differentiation	6	0.029986	PHOX2B, ASCL1, HOXA2, SOCS2, SYNGAP1, NTN1
GOTERM_BP_FAT	GO:0001503~ossification	6	0.0345796	HOXA2, NAB2, JUND, IGF2, COL1A1, BMP7
GOTERM_BP_FAT	GO:0051969~regulation of transmission of nerve impulse	6	0.0357924	CPLX3, DLG4, NCS1, SYNGAP1, SYNGR1, CAMK2A
GOTERM_BP_FAT	GO:0031644~regulation of neurological system process	6	0.0436178	CPLX3, DLG4, NCS1, SYNGAP1, SYNGR1, CAMK2A
GOTERM_CC_FAT	GO:0043025~cell soma	6	0.0464333	ACCN1, ASCL1, CPLX2, TBX21, CACNA1E, CYGB
GOTERM_MF_FAT	GO:0031402~sodium ion binding	6	0.0342839	ACCN2, ACCN1, SLC17A8, SLC38A3, SLC5A1, SLC9A1
GOTERM_BP_FAT	GO:0006813~potassium ion transport	5	0.0201166	KCNC1, KCNAB3, KCNH7, KCNK3, SCN4A
GOTERM_BP_FAT	GO:0030900~forebrain development	5	0.0231187	TWSG1, WNT1, ASCL1, FRS2, PITX1
GOTERM_CC_FAT	GO:0042470~melanosome	5	0.00300579	YWHAZ, RAB5B, YWHAB, CTSB, RAB27A
GOTERM_CC_FAT	GO:0048770~pigment granule	5	0.00300579	YWHAZ, RAB5B, YWHAB, CTSB, RAB27A
GOTERM_MF_FAT	GO:0030955~potassium ion binding	5	0.00633413	KCNC1, KCNAB3, KCNH7, KCNK3, SCN4A
GOTERM_MF_FAT	GO:0005267~potassium channel activity	5	0.00863116	KCNC1, KCNAB3, KCNH7, KCNK3, SCN4A
GOTERM_BP_FAT	GO:0006820~anion transport	5	0.0344277	SLC5A5, SLC13A5, CLCN4-2, CAPZA2, SLC4A1
GOTERM_BP_FAT	GO:0001709~cell fate determination	5	0.00105024	WNT1, ASCL1, HOXA2, TBX2, PROX1
GOTERM_BP_FAT	GO:0030705~cytoskeleton-dependent intracellular transport	5	0.00226126	NDEL1, MYL6B, PAFAH1B1, KLC2, WIPF1
GOTERM_BP_FAT	GO:0046777~protein amino acid autophosphorylation	5	0.0258264	EGFR, IRAK1, NLK, EIF2AK2, CAMK2A
GOTERM_BP_FAT	GO:0001764~neuron migration	5	0.0311944	PHOX2B, ASCL1, NDEL1, PAFAH1B1, NTN1
GOTERM_BP_FAT	GO:0006865~amino acid transport	5	0.0326313	SLC17A8, SLC38A3, CTNS, SLC6A19, APBA1
GOTERM_BP_FAT	GO:0007178~transmembrane receptor protein serine/threonine kinase signaling pathway	5	0.0437626	PDGFB, SMAD7, NLK, BMP7, STUB1
GOTERM_BP_FAT	GO:0032318~regulation of Ras GTPase activity	5	0.0472886	TBC1D24, NDEL1, ACAP3, PAFAH1B1, AGAP3
GOTERM_BP_FAT	GO:0006836~neurotransmitter transport	5	0.0472886	CPLX3, SLC17A8, CPLX2, SLC6A20B, SLC6A19
GOTERM_CC_FAT	GO:0005875~microtubule associated complex	5	0.0382937	NDEL1, DYNLL1, PAFAH1B1, KLC2, DCTN2
GOTERM_MF_FAT	GO:0015294~solute:cation symporter activity	5	0.0386786	SLC2A9, SLC6A20B, SLC5A1, SLC12A5, SLC6A19
GOTERM_MF_FAT	GO:0005249~voltage-gated potassium channel activity	4	0.0239961	KCNC1, KCNAB3, KCNH7, SCN4A
GOTERM_MF_FAT	GO:0046982~protein heterodimerization activity	4	0.0399933	FOS, HIF1A, BCL2L1, TCFEB
GOTERM_MF_FAT	GO:0022843~voltage-gated cation channel activity	4	0.045977	KCNC1, KCNAB3, KCNH7, SCN4A
GOTERM_BP_FAT	GO:0031589~cell-substrate adhesion	4	0.016508	PPARD, ITGB3, COL5A3, BCL2L11
GOTERM_BP_FAT	GO:0019216~regulation of lipid metabolic process	4	0.0172911	INSIG2, THRB, SEC14L2, ABCG1
GOTERM_BP_FAT	GO:0015698~inorganic anion transport	4	0.0435222	SLC5A5, CLCN4-2, CAPZA2, SLC4A1
GOTERM_BP_FAT	GO:0030879~mammary gland development	4	0.0475149	VDR, CAPZA2, VEGFA, BCL2L11
GOTERM_MF_FAT	GO:0003707~steroid hormone receptor activity	4	0.0116512	VDR, PPARD, ESRRA, THRB
GOTERM_MF_FAT	GO:0004879~ligand-dependent nuclear receptor activity	4	0.0166999	VDR, PPARD, ESRRA, THRB
GOTERM_BP_FAT	GO:0048168~regulation of neuronal synaptic plasticity	4	0.0104987	DLG4, SYNGAP1, SYNGR1, CAMK2A
GOTERM_BP_FAT	GO:0032012~regulation of ARF protein signal transduction	4	0.0264299	ACAP3, CYTH1, D10BWG1379E, AGAP3
GOTERM_BP_FAT	GO:0035272~exocrine system development	4	0.0321894	EGFR, PDGFB, IGF2, BMP7
GOTERM_BP_FAT	GO:0021953~central nervous system neuron differentiation	4	0.0342431	ASCL1, NDEL1, TULP3, BCL11B
GOTERM_BP_FAT	GO:0001649~osteoblast differentiation	4	0.0454988	HOXA2, JUND, IGF2, COL1A1
GOTERM_BP_FAT	GO:0048167~regulation of synaptic plasticity	4	0.0479439	DLG4, SYNGAP1, SYNGR1, CAMK2A
GOTERM_MF_FAT	GO:0001727~lipid kinase activity	4	0.0112811	PIK3CD, PIP4K2A, PIP4K2C, PIP4K2B
GOTERM_MF_FAT	GO:0004428~inositol or phosphatidylinositol kinase activity	4	0.0228029	PIK3CD, PIP4K2A, PIP4K2C, PIP4K2B
GOTERM_CC_FAT	GO:0031228~intrinsic to Golgi membrane	3	0.021183	ST8SIA6, ST8SIA2, B4GALNT1
GOTERM_CC_FAT	GO:0030173~integral to Golgi membrane	3	0.021183	ST8SIA6, ST8SIA2, B4GALNT1
GOTERM_CC_FAT	GO:0014069~postsynaptic density	3	0.0499888	SEMA4C, DLG4, SHANK3
GOTERM_MF_FAT	GO:0005044~scavenger receptor activity	3	0.0245993	TMPRSS2, LOXL4, TMPRSS5
GOTERM_BP_FAT	GO:0050810~regulation of steroid biosynthetic process	3	0.00969138	INSIG2, SEC14L2, ABCG1
GOTERM_BP_FAT	GO:0001936~regulation of endothelial cell proliferation	3	0.016448	PDGFB, CAPZA2, VEGFA
GOTERM_BP_FAT	GO:0019218~regulation of steroid metabolic process	3	0.0179825	INSIG2, SEC14L2, ABCG1
GOTERM_BP_FAT	GO:0046890~regulation of lipid biosynthetic process	3	0.0179825	INSIG2, SEC14L2, ABCG1
GOTERM_BP_FAT	GO:0048066~pigmentation during development	3	0.0322518	PLDN, GNAQ, BCL2L11
GOTERM_BP_FAT	GO:0007595~lactation	3	0.0342673	VDR, CAPZA2, VEGFA
GOTERM_MF_FAT	GO:0019905~syntaxin binding	3	0.0239011	CPLX2, CAPZA2, VAMP2
GOTERM_MF_FAT	GO:0000149~SNARE binding	3	0.0295579	CPLX2, CAPZA2, VAMP2
GOTERM_BP_FAT	GO:0046488~phosphatidylinositol metabolic process	3	0.0143053	PIP4K2A, PIP4K2C, PIP4K2B
GOTERM_BP_FAT	GO:0008088~axon cargo transport	3	0.0143053	NDEL1, PAFAH1B1, KLC2
GOTERM_BP_FAT	GO:0001101~response to acid	3	0.0228906	ACCN2, ACCN1, SLC9A1
GOTERM_BP_FAT	GO:0060749~mammary gland alveolus development	3	0.0261204	CCND1, SOCS2, PHB2
GOTERM_BP_FAT	GO:0031076~embryonic camera-type eye development	3	0.0261204	TULP3, BMP7, PROX1
GOTERM_BP_FAT	GO:0055010~ventricular cardiac muscle morphogenesis	3	0.0261204	LY6E, SMAD7, PROX1
GOTERM_BP_FAT	GO:0060070~Wnt receptor signaling pathway through beta-catenin	3	0.0295224	WNT1, CCND1, SDC1
GOTERM_BP_FAT	GO:0055008~cardiac muscle tissue morphogenesis	3	0.0368168	LY6E, SMAD7, PROX1
GOTERM_BP_FAT	GO:0010970~microtubule-based transport	3	0.0368168	NDEL1, PAFAH1B1, KLC2
GOTERM_BP_FAT	GO:0060415~muscle tissue morphogenesis	3	0.0368168	LY6E, SMAD7, PROX1
GOTERM_BP_FAT	GO:0048169~regulation of long-term neuronal synaptic plasticity	3	0.0406961	DLG4, SYNGAP1, SYNGR1
GOTERM_BP_FAT	GO:0007223~Wnt receptor signaling pathway, calcium modulating pathway	3	0.0447218	WNT1, WNT3, WNT9B
GOTERM_CC_FAT	GO:0032420~stereocilium	3	0.0253034	MYO1C, CLIC5, ESPN
GOTERM_CC_FAT	GO:0032421~stereocilium bundle	3	0.0356858	MYO1C, CLIC5, ESPN
GOTERM_MF_FAT	GO:0016309~1-phosphatidylinositol-5-phosphate 4-kinase activity	3	0.000900105	PIP4K2A, PIP4K2C, PIP4K2B
GOTERM_MF_FAT	GO:0016307~phosphatidylinositol phosphate kinase activity	3	0.0124536	PIP4K2A, PIP4K2C, PIP4K2B
GOTERM_BP_FAT	GO:0010893~positive regulation of steroid biosynthetic process	2	0.0371553	SEC14L2, ABCG1
GOTERM_BP_FAT	GO:0045542~positive regulation of cholesterol biosynthetic process	2	0.0371553	SEC14L2, ABCG1
GOTERM_BP_FAT	GO:0045940~positive regulation of steroid metabolic process	2	0.046228	SEC14L2, ABCG1
GOTERM_MF_FAT	GO:0005161~platelet-derived growth factor receptor binding	2	0.0379821	PDGFB, PTEN
GOTERM_BP_FAT	GO:0051081~nuclear envelope disassembly	2	0.0337128	NDEL1, PAFAH1B1
GOTERM_BP_FAT	GO:0030397~membrane disassembly	2	0.0337128	NDEL1, PAFAH1B1
GOTERM_CC_FAT	GO:0030687~preribosome, large subunit precursor	2	0.0493144	CASP8, WDR12
GOTERM_CC_FAT	GO:0016461~unconventional myosin complex	2	0.0493144	MYO1C, MYL6B
